# Supplementary material
Source: PubMed Central journal article supplement (PMC7613089)
Supplement: EMS119962-supplement-Supplemental_information.pdf [file EMS119962-supplement-Supplemental_information.pdf]

**Molecular Cell, Volume 78**

## **Supplemental Information**

### **A Family of Argonaute-Interacting**

### **Proteins Gates Nuclear RNAi**

**Alexandra Lewis, Ahmet C. Berkyurek, Andre Greiner, Ahilya N. Sawh, Ajay Vashisht, Stephanie Merrett, Mathieu N. Flamand, James Wohlschlegel, Mihail Sarov, Eric A. Miska, and Thomas F. Duchaine**

| LAP::NRDE-3 - wild-type background |           |                     |                  | LAP::NRDE-3 - <i>enri-1(tag1601)</i> background |            |                     |                  |
|------------------------------------|-----------|---------------------|------------------|-------------------------------------------------|------------|---------------------|------------------|
| Sequence name                      | Protein   | # datasets detected | Peptide coverage | Sequence name                                   | Protein    | # datasets detected | Peptide coverage |
| F43C11.9                           | ENRI-1    | 5/5                 | 26-50%           | T24C2.2                                         | ENRI-2     | 2/2                 | 46.3-46.8%       |
| T08B2.9                            | FARS-1    | 4/5                 | 4-16%            | K08E7.2                                         | HSB-1      | 2/2                 | 35%              |
| F16A11.3                           | PPFR-1    | 4/5                 | 1-3%             | Y56A3A.21                                       | TRAP-4     | 2/2                 | 21.4-44%         |
| K02A11.1                           | GFI-2     | 3/5                 | 9-14%            | F26F4.13                                        | KBP-2      | 2/2                 | 18.5-26.6%       |
| C02C6.1                            | DYN-1     | 3/5                 | 4-7%             | Y37E3.9                                         | PHB-1      | 2/2                 | 20-31.3%         |
| Y54H5A.1                           | Y54H5A.1  | 3/5                 | 8-9%             | T05G5.3                                         | CDK-1      | 2/2                 | 21.1-39.8%       |
| C27A12.8                           | ARI-1     | 3/5                 | 6-14%            | K04G7.4a                                        | NUO-4      | 2/2                 | 11-30.3%         |
| Y57B8A.30                          | PPH-4.1   | 3/5                 | 8-22%            | R05F9.10                                        | SGT-1      | 2/2                 | 18.4%            |
| C33G3.3                            | LGC-21    | 3/5                 | 7-12%            | Y116A8C.35a                                     | UAF-2      | 2/2                 | 10.2-15.1%       |
| F46A9.5                            | SKR-1     | 2/5                 | 31-33%           | C44B7.10                                        | ACER-1     | 2/2                 | 17.8-18.7%       |
| T24C2.2                            | ENRI-2    | 2/5                 | 14-31%           | C09H10.3                                        | NUO-1      | 2/2                 | 9-10.6%          |
| C25B8.4                            | CLEC-266  | 2/5                 | 13-22%           | K12D12.1                                        | TOP-2      | 2/2                 | 10.9-12.8%       |
| T12D8.8                            | HIP-1     | 2/5                 | 10-28%           | Y71G10AL.1                                      | Y71G10AL.1 | 2/2                 | 8.3-12%          |
| F42E11.4                           | TNI-1     | 2/5                 | 23%              | C25A1.10b                                       | DAO-5      | 2/2                 | 3.2-10.4%        |
| B0303.15                           | B0303.15  | 2/5                 | 20%              | W01G7.3                                         | RPB-11     | 2/2                 | 17.2-27%         |
| F30F8.9                            | F30F8.9   | 2/5                 | 17-18%           | F44E5.4                                         | F44E5.4    | 2/2                 | 13.8-14%         |
| Y54E10A.6                          | Y54E10A.6 | 2/5                 | 13-15%           | Y49E10.1                                        | RPT-6      | 2/2                 | 15.6-26.9%       |
| W02D3.2                            | DHOD-1    | 2/5                 | 13-15%           | F31E3.3                                         | RFC-4      | 2/2                 | 23.4-37.1%       |
| H06O01.1                           | PDI-3     | 2/5                 | 11-13%           | R04F11.2                                        | R04F11.2   | 2/2                 | 10.3-40.2%       |
| B0361.5                            | PSD-1     | 2/5                 | 14%              | F58F12.1                                        | F58F12.1   | 2/2                 | 16-25.2%         |
| C01B10.11                          | C01B10.11 | 2/5                 | 14%              | Y110A2AL.13                                     | PINN-1     | 2/2                 | 12.4-26.7%       |
| C06G3.9                            | C06G3.9   | 2/5                 | 7-13%            | B0250.5                                         | B0250.5    | 2/2                 | 16.1-41.1%       |
| B0511.1                            | FKB-7     | 2/5                 | 8-10%            | F56F11.4                                        | F56F11.4   | 2/2                 | 12.1-24%         |

|            |            |     |       |            |           |     |            |
|------------|------------|-----|-------|------------|-----------|-----|------------|
| F37C4.5    | F37C4.5    | 2/5 | 4-17% | C52D10.9   | SKR-8     | 2/2 | 10.8-23.7% |
| C06A5.6    | C06A5.6    | 2/5 | 5-11% | Y105C5B.13 | SKR-10    | 2/2 | 19.8-21.4% |
| C07E3.1    | STIP-1     | 2/5 | 4-11% | C04C3.3    | PDHB-1    | 2/2 | 16.2-16.5% |
| Y37D8A.9   | MRG-1      | 2/5 | 9%    | W02D3.1    | CYTB-5.2  | 2/2 | 15.6-22%   |
| B0495.8    | B0495.8    | 2/5 | 8-9%  | Y53F4B.22a | ARP-1     | 2/2 | 8.6-21.4%  |
| F33D4.6    | F33D4.6    | 2/5 | 6-8%  | H34C03.2a  | H34C03.2a | 2/2 | 14.2-21.9% |
| Y108G3AL.2 | Y108G3AL.2 | 2/5 | 7%    | C36B1.3    | RPB-3     | 2/2 | 14.2%      |
| T21D12.4   | PAT-6      | 2/5 | 7%    | Y71H2AM.23 | TUFM-1    | 2/2 | 4.8-19.6%  |
| K02F2.2    | AHCY-1     | 2/5 | 7%    | C26E6.4    | RPB-2     | 2/2 | 14.8-21%   |
| Y55F3BR.1  | Y55F3BR.1  | 2/5 | 6-7%  | F37C4.5a   | F37C4.5a  | 2/2 | 9-21.1%    |
| Y47D3A.16  | RSKS-1     | 2/5 | 5-7%  | T01G9.6a   | KIN-10    | 2/2 | 12-26.5%   |
| F22B7.5    | DNJ-10     | 2/5 | 5-7%  | D2085.1    | PYR-1     | 2/2 | 11.1-12.6% |
| C25H3.4    | C25H3.4    | 2/5 | 3-8%  | R07E5.3    | SNFC-5    | 2/2 | 16.8-21.8% |
| ZK1053.4   | ZK1053.4   | 2/5 | 5%    | W08F4.3    | W08F4.3   | 2/2 | 17.1-22.8% |
| T10F2.3    | ULP-1      | 2/5 | 4%    | F56G4.2    | PES-2.1   | 2/2 | 9.4-10.3%  |
| C33G3.6    | C33G3.6    | 2/5 | 3-4%  | Y44E3A.6   | Y44E3A.6  | 2/2 | 9.5-20.5%  |
| F58G1.1    | WAGO-4     | 2/5 | 2-3%  | C15H11.7   | PAS-1     | 2/2 | 9.3-15.4%  |
| Y45F10D.7  | Y45F10D.7  | 2/5 | 2%    | K10C3.6    | NHR-49    | 2/2 | 10.2-12.4% |
| ZK688.5    | ZK688.5    | 2/5 | 2%    | Y60A3A.9   | Y60A3A.9  | 2/2 | 8.5-13.3%  |
| F02E9.4    | SIN-3      | 2/5 | 2%    | Y47D3A.26  | SMC-3     | 2/2 | 10.7-11.3% |

**Table S1. List of proteins found in NRDE-3 purifications. Refers to Figure 1.** All proteins found in at least 2 biological replicates (2 independent purifications) are listed with their sequence name, protein name, number of datasets they were found in, and peptide coverage.

| Oligonucleotide sequence                                                                                                                                                                      | Source     |
|-----------------------------------------------------------------------------------------------------------------------------------------------------------------------------------------------|------------|
| <i>enri-1</i> crRNA ( <i>qe16</i> ): TACGACAGCAAACTATATT                                                                                                                                      | This study |
| <i>enri-2</i> crRNA ( <i>qe21</i> ): CCGTCAAGAAAGTCACCGATAGC                                                                                                                                  | This study |
| <i>enri-2</i> crRNA ( <i>qe21</i> ): ACGATTACAATCCATTCAAGTGG                                                                                                                                  | This study |
| <i>enri-3</i> crRNA ( <i>qe17</i> ): ttttacagattaatagac                                                                                                                                       | This study |
| <i>enri-3</i> crRNA ( <i>qe19, qe20</i> ): CTGACAGAAATGCCCGATGG                                                                                                                               | This study |
| <i>enri-1</i> crRNA 5' ( <i>tag1600, tag1601</i> ): GGATCCGGAATATGATTCCGG                                                                                                                     | This study |
| <i>enri-1</i> crRNA 3' ( <i>tag1600, tag1601</i> ): GTAAAATTGCCGAGTCTGTTG                                                                                                                     | This study |
| <i>enri-2</i> crRNA 5' ( <i>tag1609</i> ): TTTTCAATGGTTTTATGG                                                                                                                                 | This study |
| <i>enri-2</i> crRNA 3' ( <i>tag1609</i> ): TTTTTGGGCTCCGCAACGG                                                                                                                                | This study |
| <i>enri-2::3xflag</i> crRNA: GTTGGGGTTTTAAAGAGTTG                                                                                                                                             | This study |
| <i>gfp::enri-1</i> crRNA: ATTGGATGTTTGGTAATTTA                                                                                                                                                | This study |
| <i>enri-2::gfp</i> crRNA: ACAATCCATTCAAGTGGTTG                                                                                                                                                | This study |
| <i>enri-3::gfp</i> crRNA: CTTTGGGTTTGGGAAATTAT                                                                                                                                                | This study |
| <i>enri-1</i> ( <i>qe16</i> ) repair template:<br>CGGCAATGGCAGCTCTGCTAACACTCTACGACAGCAAACTATtagctgactaagcttcgc<br>ATTCGGAACGTTTTCGGAATATCTAATAACAAATGAC                                       | This study |
| <i>enri-2::3xflag</i> repair template:<br>GATGACGACGATTACAATCCATTCAAGTGGTTGGGGTTTgactacaaggaccacgacggtg<br>actacaaggaccacgaTatcgactacaaggacgacgacgacaagTAAagagttgtggagattgttttaattgat<br>cacg | This study |
| 2X TY1 <i>enri-1</i> GFP primer F:<br>AATATGATTCCGAGGAAGAGTATAATTGGATGTATAAATTGGATGTTTGGGAAGTG<br>CATACCAATCAGGACCCGC                                                                         | This study |
| 2X TY1 <i>enri-1</i> GFP primer R:<br>TTCTTGGGTTCAACGTTGTCTATGCAAGAAAAAGAAGAGATCCATAAATTACTTGTA<br>GAGCTCGTCCATTCCGTGG                                                                        | This study |
| 2X TY1 <i>enri-2</i> GFP primer F:<br>AGCGCTGAGGATGATGAATATGATTCCGAATATGATGACGACGACTACAACCCTT<br>TTAAATGGTTGGGGTTTGAAGTGCATACCAATCAGGACCCGC                                                   | This study |
| 2X TY1 <i>enri-2</i> GFP primer R:<br>CTAGAAAATAAACGTGATATCAATTTAAACAAATCTCCACAACCTTTACTTGTAG<br>AGCTCGTCCATTCCGTGG                                                                           | This study |
| 2X TY1 <i>enri-3</i> GFP primer F:<br>ATGCTGCGGTTACGATGATGGTTACGACGAAGGCCACGAATACTGCCAAGGAG<br>GCGGGGGTTCTGGGGGAGGTG                                                                          | This study |
| 2X TY1 <i>enri-3</i> GFP primer R:<br>CGGGGAACCGTAAAAATGGGGATAAAATGTGCTTTGGGTTTGGGAAATTACTTGT<br>AGAGCTCGTCCATTCCGTGG                                                                         | This study |
| pBlueScript Gibson <i>pbli-1::enri-2</i> primer F:<br>GGGTTTTAAGAGCTCCAGCTTTTGTCCCTT                                                                                                          | This study |
| pBlueScript Gibson <i>pbli-1::enri-2</i> primer R: acgacgtGAGCTCCAGCTTTTGTCCCTT                                                                                                               | This study |
| <i>nip-2</i> Gibson <i>pbli-1::enri-2</i> primer F: taacctcatcATGTTTAGCGTTTACGCCACC                                                                                                           | This study |
| <i>nip-2</i> Gibson <i>pbli-1::enri-2</i> primer R: TGGAGCTCacgctgtttattgaaatgaactcaacgaac                                                                                                    | This study |
| <i>bli-1</i> Gibson <i>pbli-1::enri-2</i> primer F: CGAATTCtcccgcggactcccaggacc                                                                                                               | This study |
| <i>bli-1</i> Gibson <i>pbli-1::enri-2</i> primer R: CGCTAAACATgatgaggttagatcacactactctccg                                                                                                     | This study |
| pBlueScript Gibson <i>pbli-1::enri-1</i> primer F:<br>cgcgggaaGATATCAAGCTTATCGATACCGTCGACCT                                                                                                   | This study |
| pBlueScript Gibson <i>pbli-1::enri-1</i> primer R:<br>tacaagactaGGATCCACTAGTTCTAGAGCGGC                                                                                                       | This study |
| <i>bli-1</i> Gibson <i>pbli-1::enri-1</i> primer F:<br>TTGATATCtcccgcggactcccaggacc                                                                                                           | This study |

|                                                                                                              |                        |
|--------------------------------------------------------------------------------------------------------------|------------------------|
| <i>bli-1</i> Gibson <i>pbli-1::enri-1</i> primer R:<br>GCTATTTTCATgatgagggttagatcacactactctccg               | This study             |
| <i>enri-1</i> Gibson <i>pbli-1::enri-1</i> primer F:<br>ctaacctcatcATGAAAATAGCAAATTCACCCGAATTAATGC           | This study             |
| <i>enri-1</i> Gibson <i>pbli-1::enri-1</i> primer F:<br>CTAGTGGATCCtagtctgtatgtattctgtagtctatactgtaaaggactat | This study             |
| <i>enri-1</i> cDNA primer F for pET-28a cloning:<br>ATAATAGAATTCATGAAAATAGCAAATTCACC                         | This study             |
| <i>enri-1</i> cDNA primer R for pET-28a cloning:<br>TATTATGTCGACTTACCAAACATCCAATTTATACA                      | This study             |
| <i>nrde-3</i> cDNA (aa 1-383) primer F for pSMT3 cloning:<br>AATTAAGAGCTCGATCTCCTAGACAAAGTAATG               | This study             |
| <i>nrde-3</i> cDNA (aa 1-383) primer R for pSMT3 cloning:<br>AATAAACTCGAGATAATCAATTTACCATCACGC               | This study             |
| T7- <i>unc-22</i> RNAi F: TAATACGACTCACTATAGGGGGAAGATGGGTTCCATGCG                                            | Kamath et al.,<br>2003 |
| T7- <i>unc-22</i> RNAi R: TAATACGACTCACTATAGGGCCGAGCACAATGACCTCAAC                                           | Kamath et al.,<br>2003 |
| T7- <i>lir-1</i> RNAi F: GTAATACGACTCACTATAGGGACTCCGCTCCACCCCTATAC                                           | Kamath et al.,<br>2003 |
| T7- <i>lir-1</i> RNAi R: GTAATACGACTCACTATAGGGGCTCACCCCTCTCAACTCGTC                                          | Kamath et al.,<br>2003 |
| T7- <i>dpy-11</i> RNAi F: TAATACGACTCACTATAGGGAGATCTTCCAAGCTCGTCTTTCT                                        | Kamath et al.,<br>2003 |
| T7- <i>dpy-11</i> RNAi R: TAATACGACTCACTATAGGGATGTGCTTTAATTACGTGTCGT                                         | Kamath et al.,<br>2003 |
| T7- <i>bli-1</i> RNAi F: TAATACGACTCACTATAGGGCACACCGACAACTCCACAC                                             | Kamath et al.,<br>2003 |
| T7- <i>bli-1</i> RNAi R: TAATACGACTCACTATAGGGGGGAAGGGGTGAAAATAAA                                             | Kamath et al.,<br>2003 |
| <i>nrde-3</i> (aa 1-383) primer F for pGEX-6p-1 cloning:<br>ATAGAATTCATGGATCTCCTAGACAAAGTAATGG               | This study             |
| <i>nrde-3</i> (aa 1-383) primer R for pGEX-6p-1 cloning:<br>AATACTCGAGATAATCAATTTACCATCACGC                  | This study             |
| <i>nrde-3</i> (aa 365-701) primer F for pGEX-6p-1 cloning:<br>ATAGAATTCGGGAACAGTAGAAAATACGATG                | This study             |
| <i>nrde-3</i> (aa 365-701) primer R for pGEX-6p-1 cloning:<br>ATAGTCGACTTAGGTTTGCTGTCCAAGCTTCTC              | This study             |
| <i>nrde-3</i> (aa 683 – 1058) primer F for pGEX-6p-1 cloning:<br>ATAGAATTCGACCAGATATGCATGACATTCTC            | This study             |
| <i>nrde-3</i> (aa 683 – 1058) primer R for pGEX-6p-1 cloning:<br>ATAGTCGACTTATGCCAAAAGTTGCGTC                | This study             |
| <i>enri-1</i> primer F for pSMT3 cloning:<br>ATCGGCGGAGCTCATGAAAATAGCAAATTCACCCG                             | This study             |
| <i>enri-1</i> primer R for pSMT3 cloning:<br>ATAATAGCGGCCGCCCAAACATCCAATTTATAC                               | This study             |
| <i>enri-2</i> primer F for pSMT3 cloning:<br>AATTAAGAGCTCTTTAGCGTTTACGCCCAC                                  | This study             |
| <i>enri-2</i> primer R for pSMT3 cloning:<br>AATAAACTCGAGTTAAAACCCCAACCACTTGAATG                             | This study             |

**Table S3. Related to STAR methods.** List of oligonucleotides including primers, crRNAs and repair templates used throughout the manuscript.

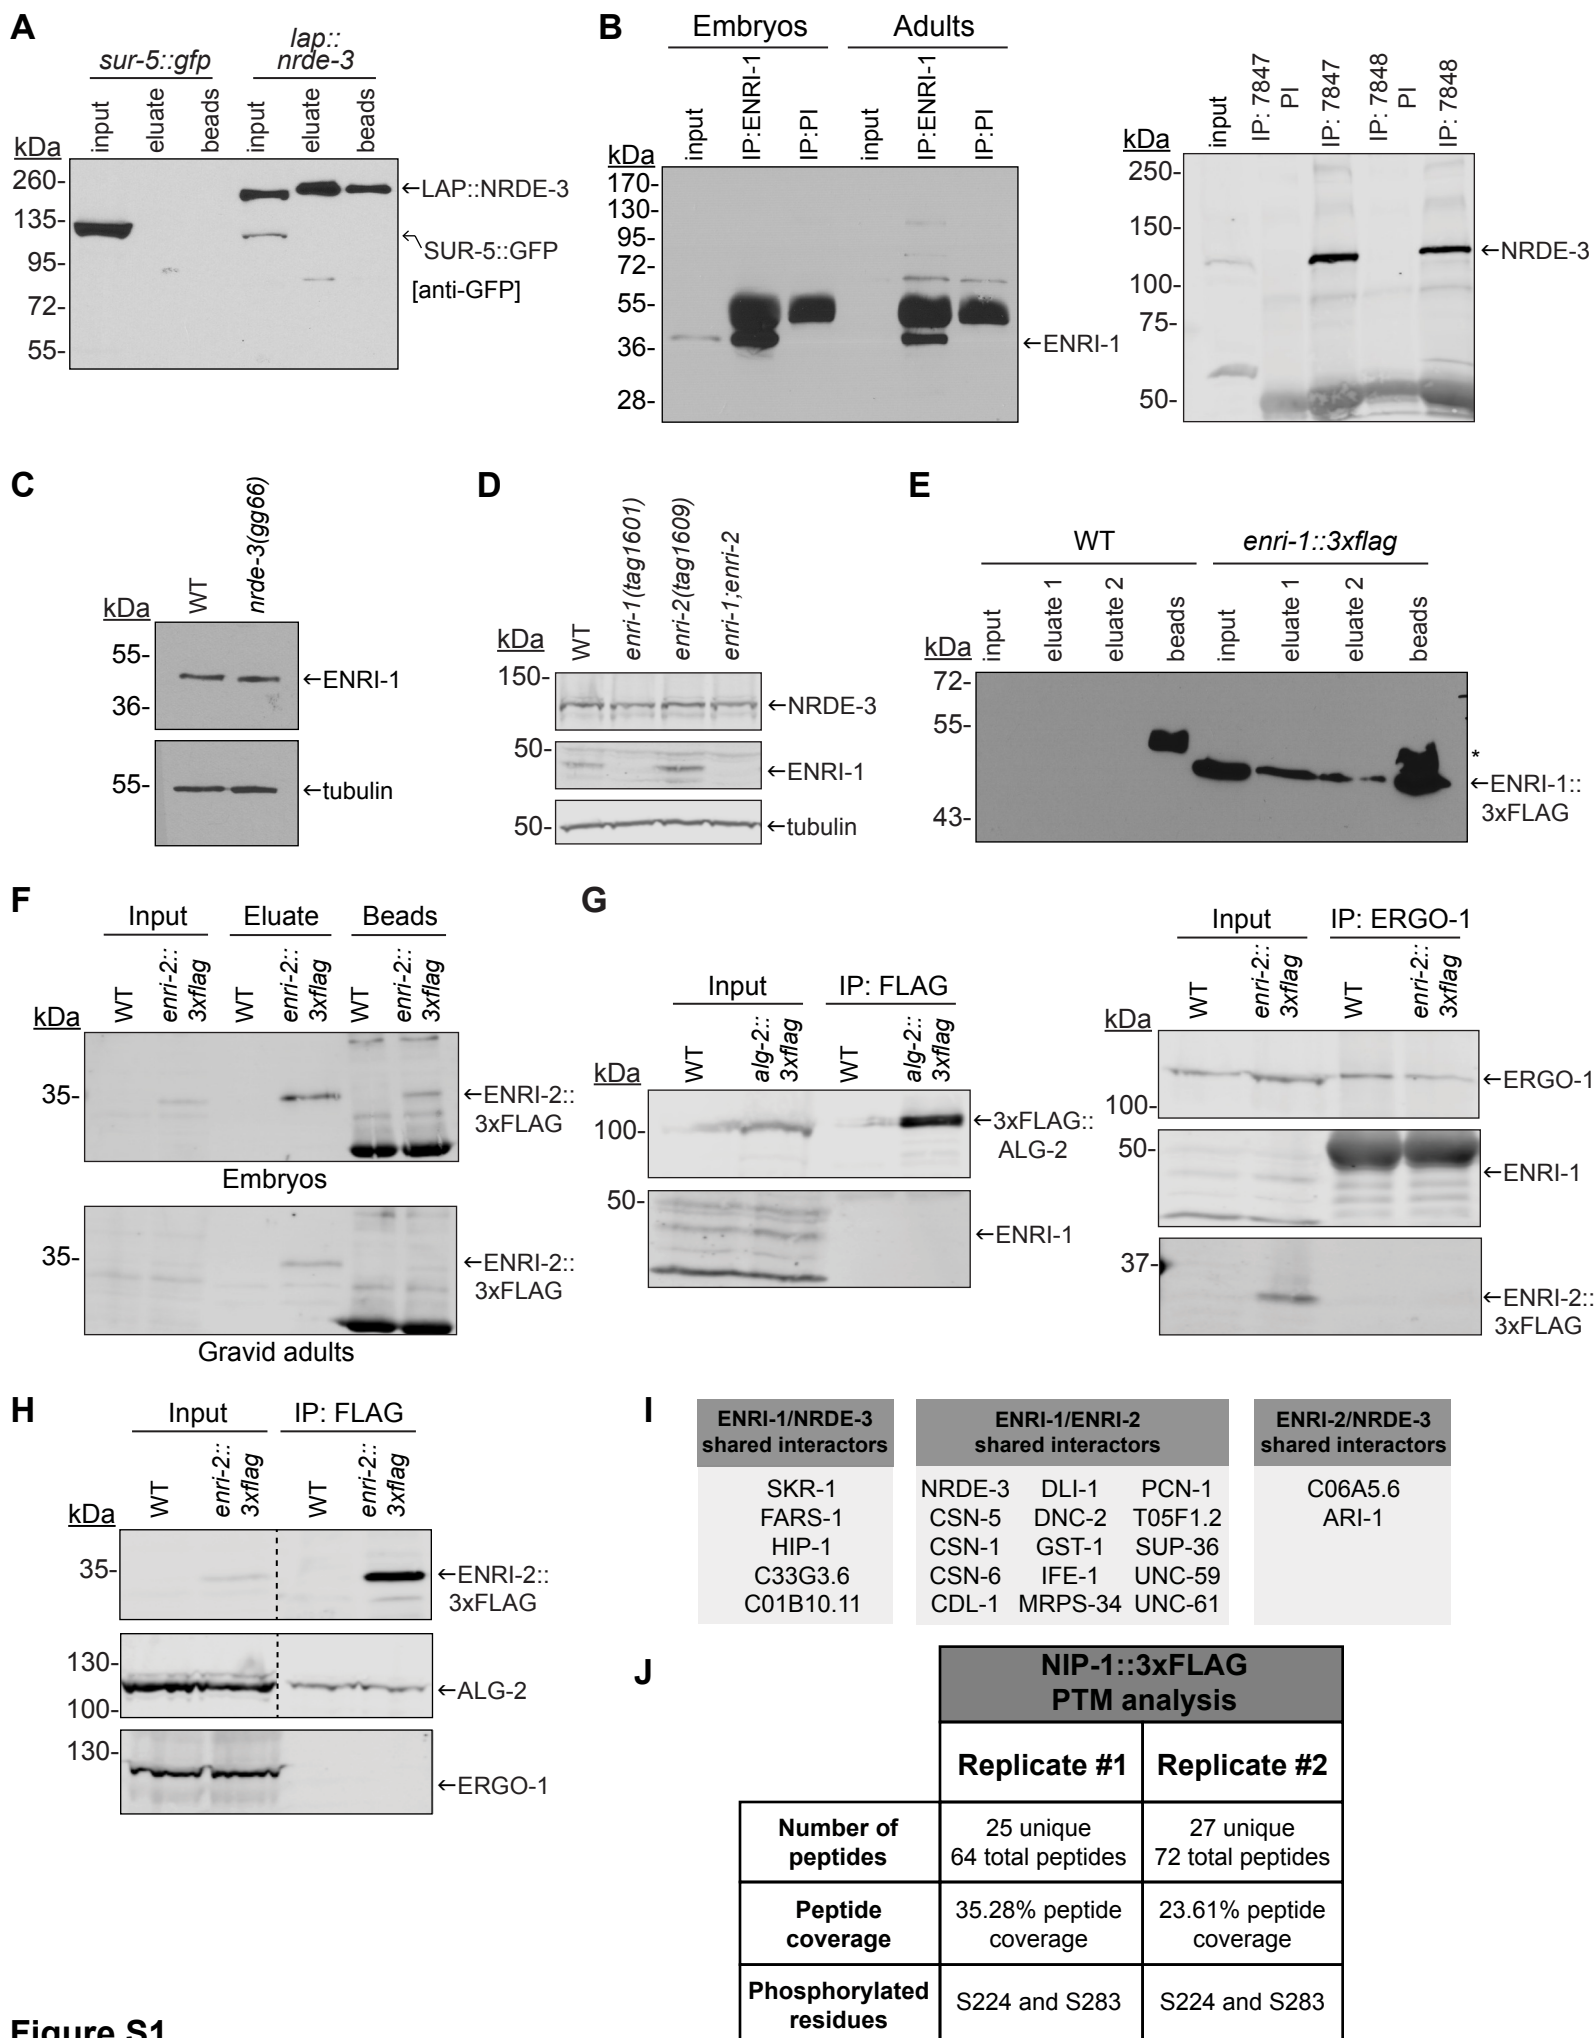

Figure S1

**Figure S1. Refers to Figure 1. Purification of NRDE-3 and ENRI-1.** (A) Representative western blot (GFP antibody) from FLAG purifications performed on *lap::nrde-3* embryos and *sur-5::gfp* embryos (negative control). Proteins were eluted with FLAG peptide and 25% of the eluate was analyzed by western blot to confirm efficacy of purifications. (B) Left: Newly generated ENRI-1 antibody was used to IP endogenous ENRI-1 from wild-type adult and embryo extracts using the pre-immune (PI) serum as a negative control. The same antibody was used to perform a western blot to confirm its ability to IP ENRI-1. Right: Newly generated NRDE-3 antibodies from two rabbits (#7847 and #7848) were used to IP endogenous NRDE-3 from wild-type embryo extracts using the pre-immune (PI) serum as a negative control. The serum from rabbit #7848 was used to perform a western blot to confirm its ability to IP and detect NRDE-3. Serum #7848 was used in IPs and western blots for the rest of the experiments. (C) Wild-type and *nrde-3(gg66)* embryo lysates were probed with the ENRI-1 antibody and tubulin antibody. (D) Wild-type, *enri-1(tag1601)*, *enri-2(tag1609)*, *enri-1(tag1601);enri-2(tag1609)* embryo lysates were probed with polyclonal antibodies to NRDE-3 and ENRI-1 and a tubulin antibody. (E) Representative western blot (FLAG antibody) from FLAG purifications performed on transgenic *enri-1::3xflag* embryos. Proteins were eluted with FLAG peptide and 25% of eluates were analyzed by western blot to confirm efficacy of purifications. Beads were incubated twice with the FLAG peptide to maximize elution efficacy. (F) Representative western blot (FLAG antibody) from FLAG purifications performed on *enri-2::3xflag* embryos and gravid adults. Proteins were eluted with 0.5M NH<sub>4</sub>OH pH 11 and 25% of the eluate was analyzed by western blot to confirm efficacy of purifications. (G) Left: Wild-type and *alg-2::3xflag* embryos were subjected to FLAG immunoprecipitation and probed for FLAG and ENRI-1. Right: Wild-type and *enri-2::3xflag* embryos were subjected to endogenous ERGO-1 immunoprecipitation and probed for ERGO-1, ENRI-1, and FLAG. (H) Wild-type and *enri-2::3xflag* embryos were subjected to FLAG immunoprecipitation. Input and IPs were probed for FLAG, and endogenous ALG-2 and ERGO-1. In the FLAG and ALG-2 blots, the dotted lines represent the removal of two unrelated lanes. (I) Shared interactors between ENRI-1/NRDE-3, ENRI-1/ENRI-2, and ENRI-2/NRDE-3. (J) NIP-1::3xFLAG was immunoprecipitated from embryos and the band corresponding to NIP-1::3xFLAG was cut out of a Coomassie-stained gel and subsequently sent for mass

spectrometry and post-translational modification analysis. Table depicts the number of peptides recovered in each replicate, peptide coverage and the two confidently assigned phosphorylated residues.



**A**

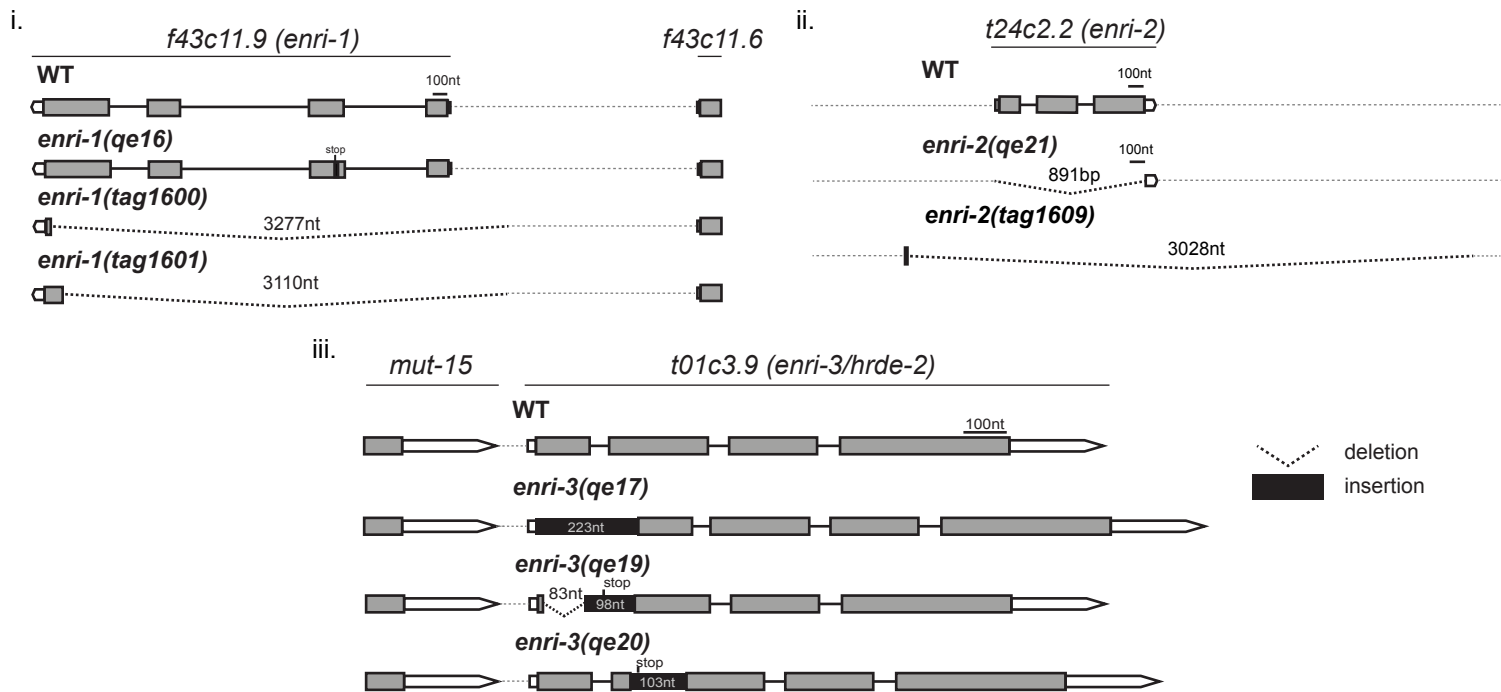

**B**

**Brood size at 25°C**

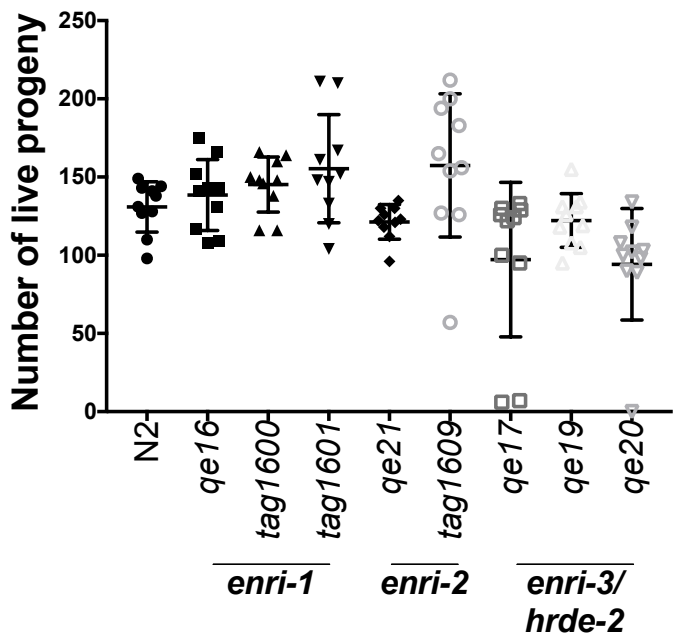

**C**

**Mortal Germline Phenotype**

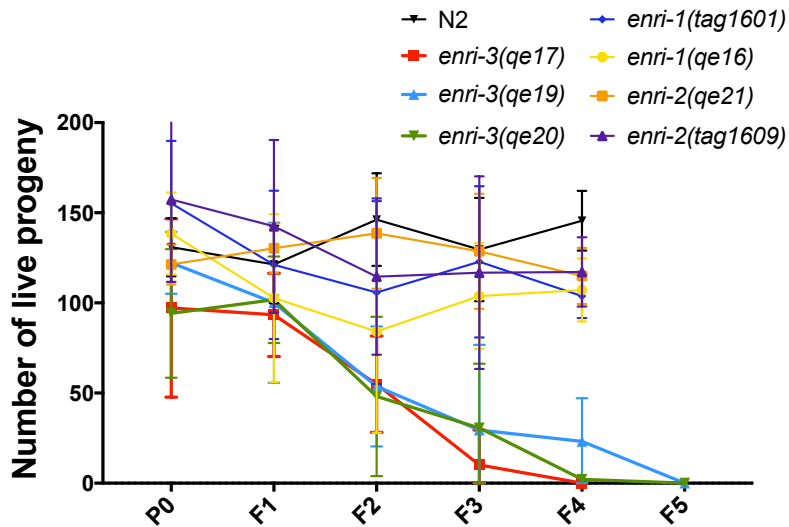

Figure S2

**Figure S2. Refers to Figure 2. Generation and characterization of *enri* mutants using CRISPR/Cas9.** (A) Null alleles were generated for *enri-1*, *enri-2* and *enri-3* using the CRISPR/Cas9 gene editing system. Deletions and insertions are to scale. (B) Brood sizes of  $n > 10$  worms were scored at 25°C. Data is depicted as mean  $\pm$  SD. (C) Animals were switched to 25°C after being grown at 16°C for at least 3 generations. Brood size of  $n > 10$  worms were monitored at each generation for up to 5 generations to monitor for the mortal germline phenotype. Data is depicted as mean  $\pm$  SD.

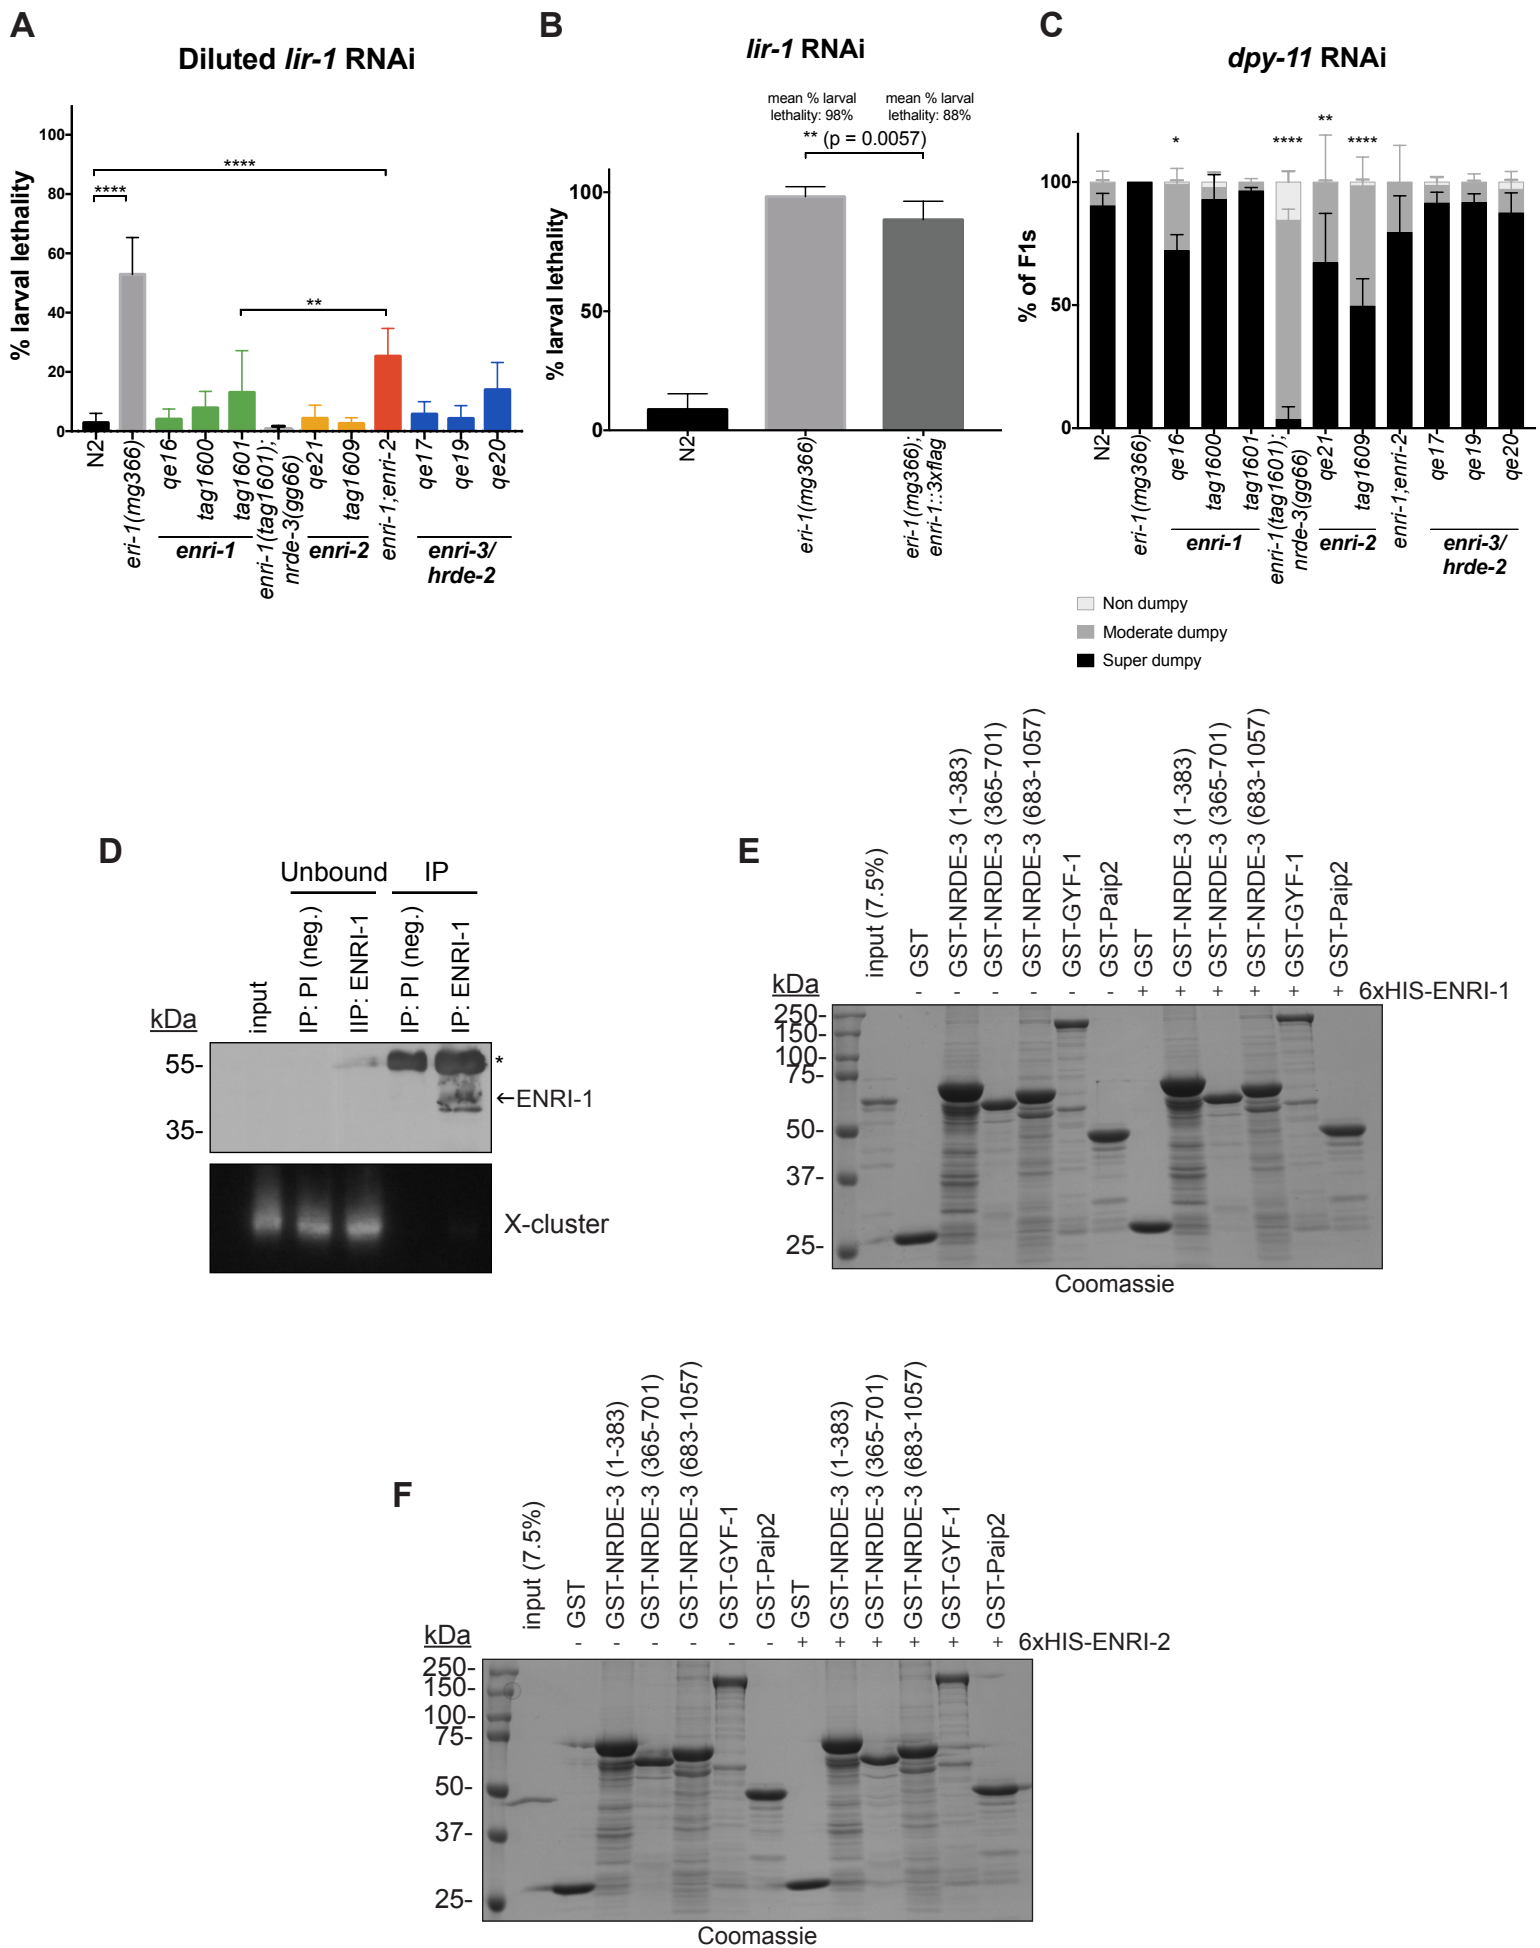

Figure S3

**Figure S3. Refers to Figure 2 and 3. ENRI-1 and ENRI-2 bind unloaded NRDE-3 and suppress nuclear RNAi.** (A) *lir-1* RNAi bacteria was diluted 3-fold in M9 before seeding on plates. Tukey's multiple comparisons test was performed to determine statistical significance. Data is depicted as mean  $\pm$  SD. (B) Worms overexpressing transgenic ENRI-1::3xFLAG in the *eri-1(mg366)* background, as well as wild-type and *eri-1(mg366)* worms were exposed to *lir-1* feeding RNAi at the L1 stage and 3 days later the number of animals that had survived to the gravid adult stage were quantified (n > 3 biological replicates). Tukey's multiple comparisons test was performed to determine statistical significance. Data is depicted as mean  $\pm$  SD. (C) Worms were exposed to *dpy-11* RNAi at the L4 stage and their progeny was scored for the dumpy phenotype at the gravid adult stage. Worms were scored as being non-dumpy, moderately dumpy, or super dumpy. Asterisks indicate differences in the number of super dumpy worms compared to N2 (WT). Data is depicted as mean  $\pm$  SD. For all RNAi assays: p-value: 0.05 – 0.0332 (\*), 0.0333 – 0.0021 (\*\*), 0.0022 – 0.0002 (\*\*\*), < 0.0001 (\*\*\*\*). (D) RNA extracted from an endogenous ENRI-1 IP (pre-immune (PI) serum used as a negative control) was probed for the X-cluster. (E + F) Coomassie stained gel of the GST pull-down between 6xHIS-ENRI-1 (E) or 6xHIS-ENRI-2 (F) and three fragments of GST-NRDE-3, and GST, GST-GYF-1, and GST-Paip2 as negative controls. 50% of the pull-down was loaded onto a 10% SDS-PAGE gel for Coomassie staining. Each pull-down was performed at least 4 times and a representative blot for each is shown.

**A****LAP::NRDE-3 WT libraries**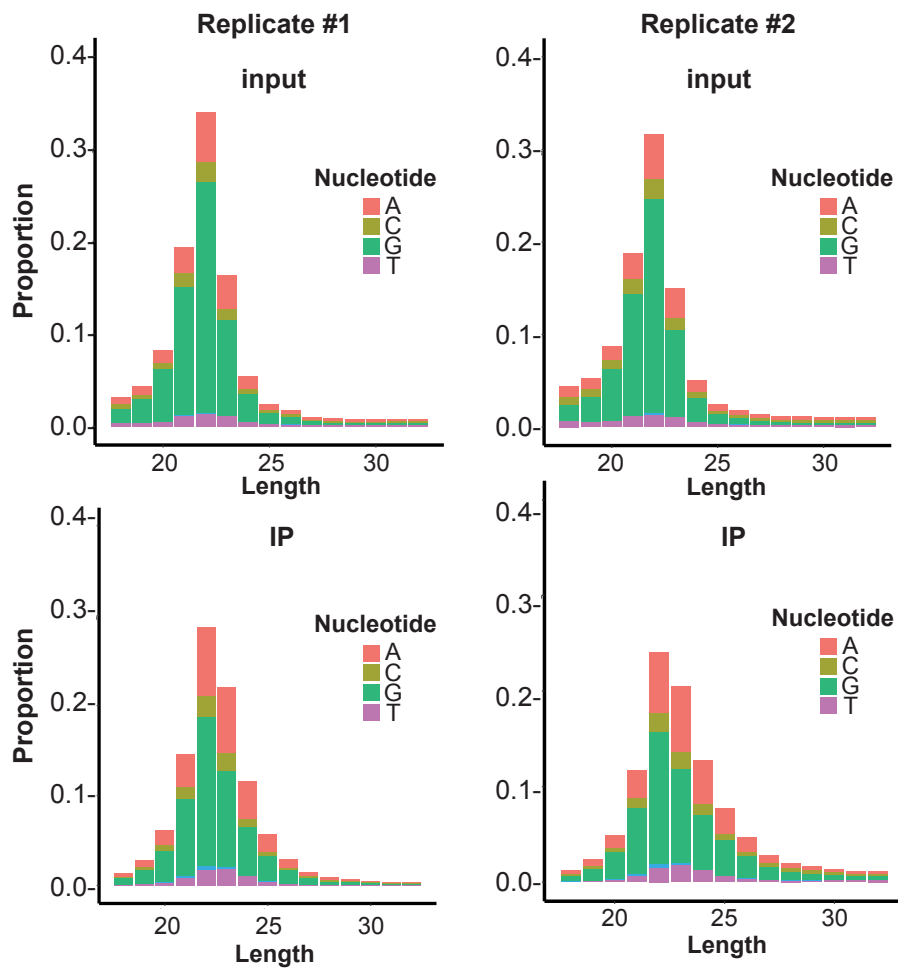**B****LAP::NRDE-3; *enri-1*; *enri-2* libraries**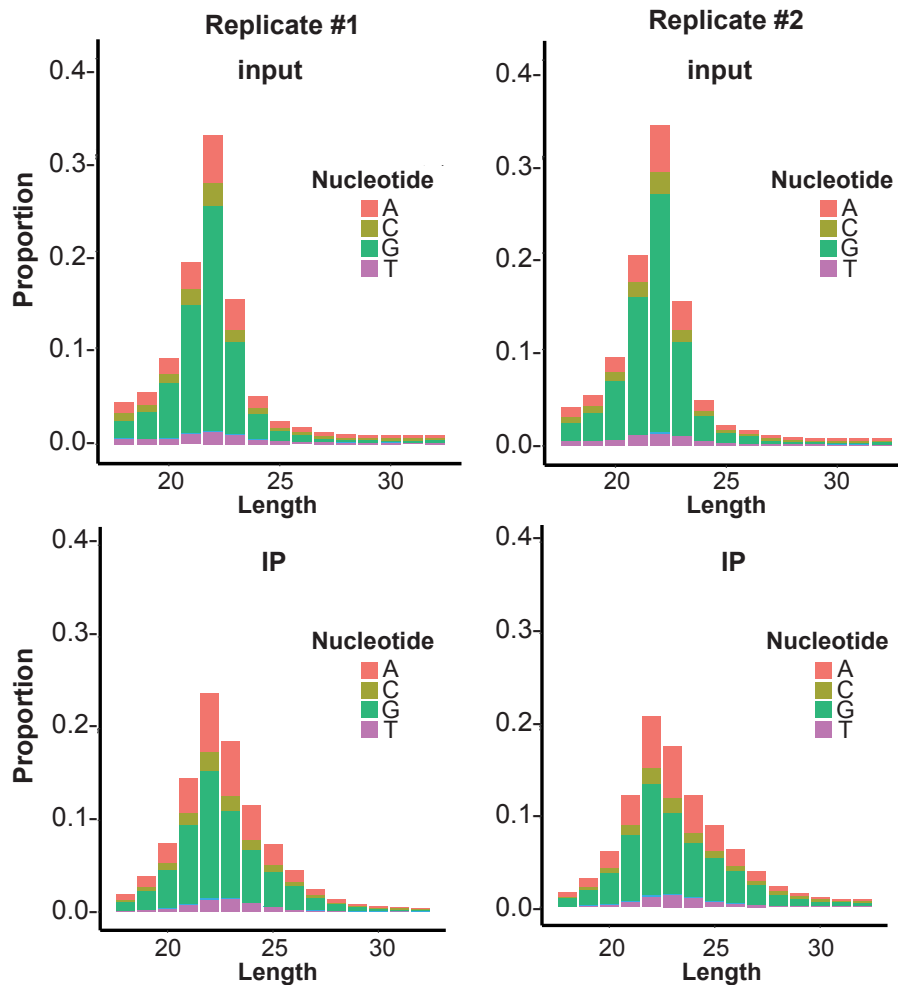**Figure S4**

**Figure S4. Refers to Figure 5. 22G-RNAs are enriched in libraries.** (A) Enrichment of 22G-RNAs after 5' independent library preparation from the input (top) and LAP::NRDE-3 IP (bottom) fractions in wild-type embryos. (B) Enrichment of 22G-RNAs after 5' independent library preparation from the input (top) and LAP::NRDE-3 IP (bottom) fractions in *enri-1(tag1601);enri-2(tag1609)* embryos.

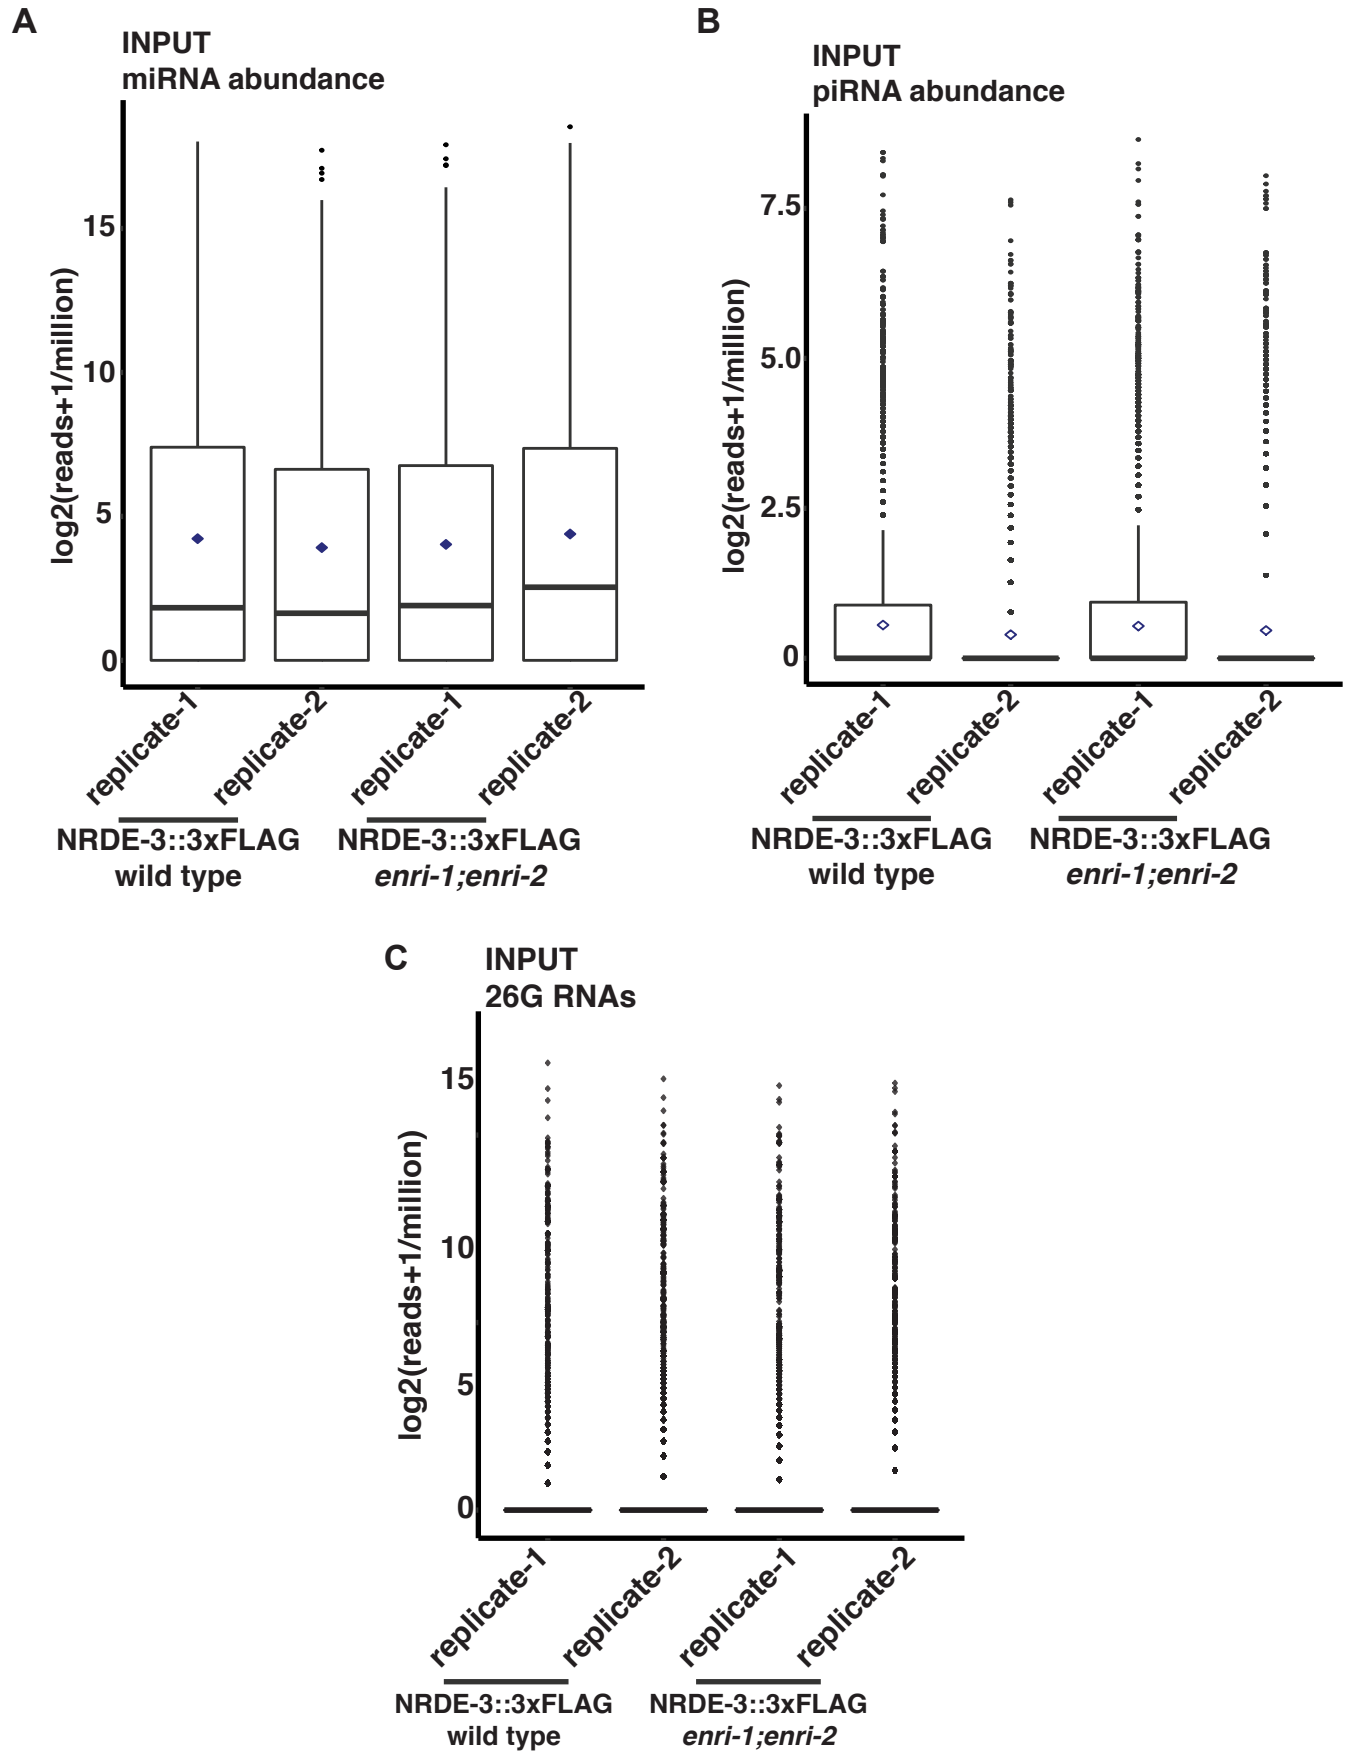

Figure S5

**Figure S5. Refers to Figure 5. Abundance of other small RNAs species in the libraries.** (A) Abundance of miRNAs in the input fraction of each replicate from wild-type and *enri-1;enri-2* embryos. (B) Abundance of piRNAs in the input fraction of each replicate from wild-type and *enri-1;enri-2* embryos. (C) Abundance of 26G-RNAs in the input fraction of each replicate from wild-type and *enri-1;enri-2* embryos.



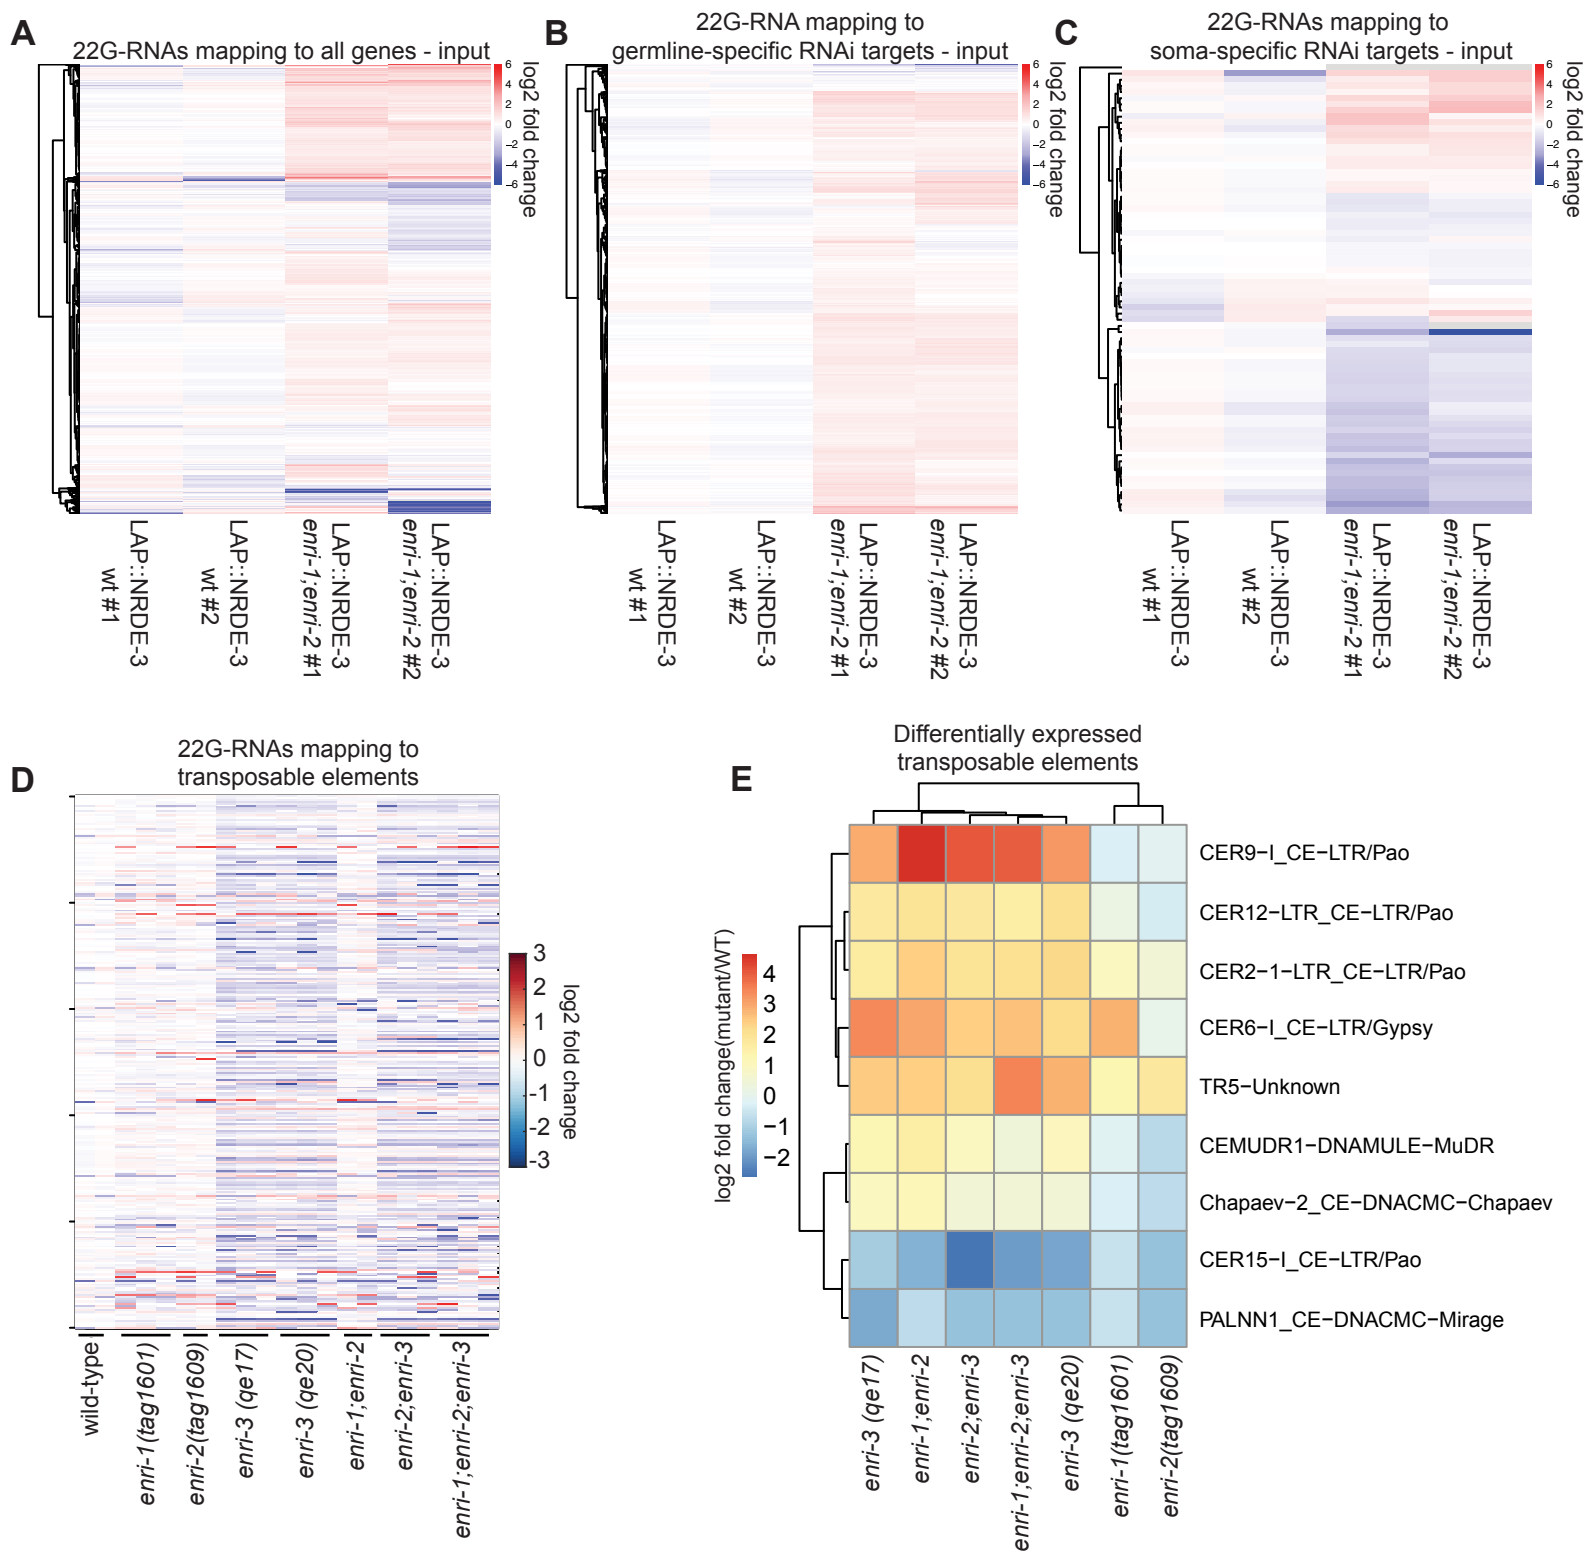

**Figure S6**

**Figure S6. Refers to Figures 5 and 6. Mutant *enri-1* and *enri-2* embryos display defects in 22G-RNA accumulation.** (A) Heat map of all 22G-RNAs mapping to individual genes from the input samples (WT and *enri-1;enri-2*). (B) Heat map of 22G-RNAs mapping to all annotated germline-specific RNAi targets from the input samples (WT and *enri-1;enri-2*). (C) Heat map of 22G-RNAs mapping to all annotated soma-specific RNAi targets from the input samples (WT and *enri-1;enri-2*). (D) Heat map of all 22G-RNAs mapping to annotated transposable elements from wild-type, *enri-1(tag1601)*, *enri-2(tag1609)*, *enri-3(qe17)*, *enri-3(qe20)*, *enri-1(tag1601);enri-2(tag1609)*, *enri-2(tag1609);enri-3(qe19)*, *enri-1(tag1601);enri-2(tag1609);enri-3(qe19)*. (E) Heat map of transposable elements (total mRNA) that were differentially expressed in *enri-1(tag1601)*, *enri-2(tag1609)*, *enri-3(qe17)*, *enri-3(qe20)*, *enri-1(tag1601);enri-2(tag1609)*, *enri-2(tag1609);enri-3(qe19)*, and *enri-1(tag1601);enri-2(tag1609);enri-3(qe19)* young adults compared to wild-type.

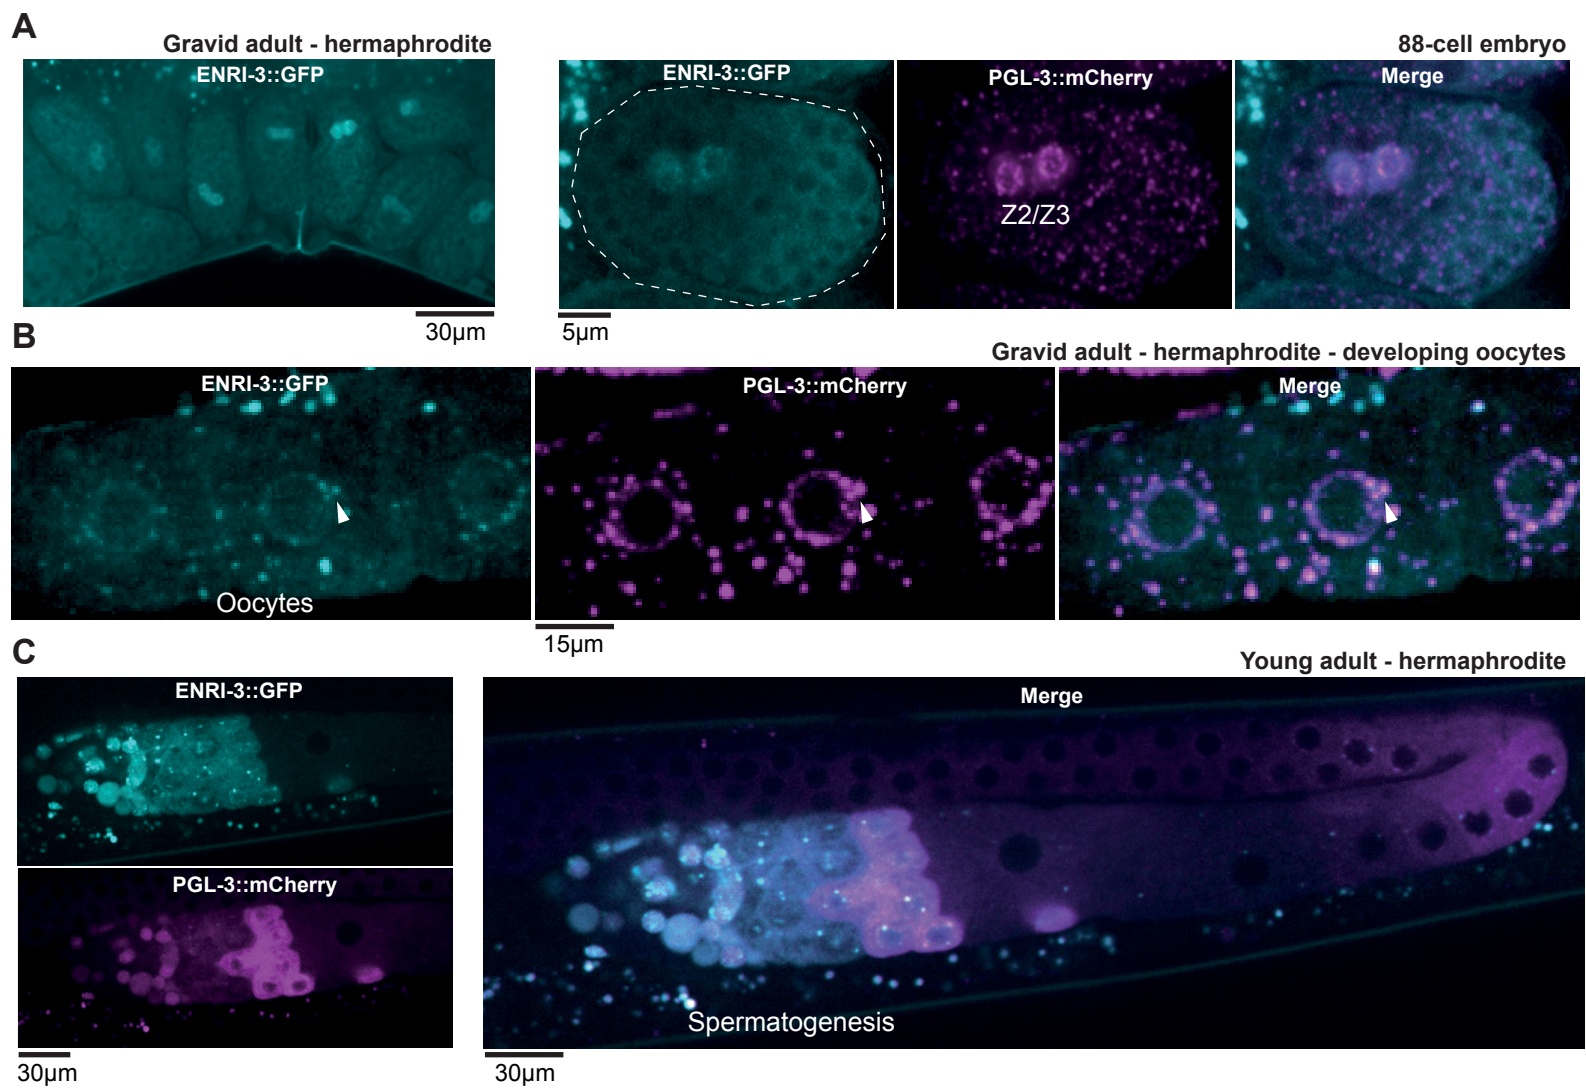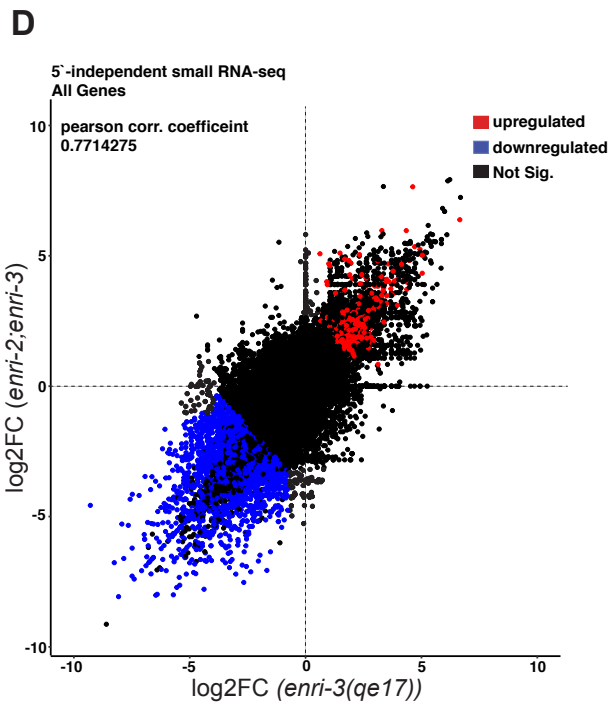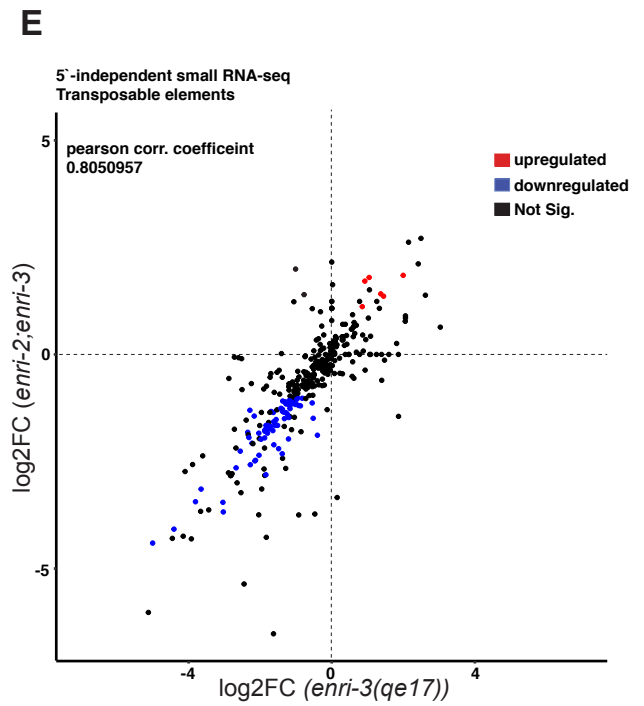

Figure S7

**Figure S7. Refers to Figure 6. ENRI-3: Small RNA sorting in the male germline.** (A) Left: expression imaging of ENRI-3::GFP in embryos inside gravid adult hermaphrodites. Right: expression imaging of ENRI-3::GFP and PGL-3::mCherry (P-granule marker) in 88-cell embryos. (B) Top: Expression imaging of ENRI-3::GFP and PGL-3::mCherry in oocytes of gravid adult hermaphrodites. Bottom: Expression imaging of ENRI-3::GFP and PGL-3::mCherry in the germline of young adult hermaphrodites. (D) (E) Correlation between 22G-RNA changes in *enri-3(qe17)* and *enri-3(qe19);enri-2(tag1609)* datasets targeting (D) all genes and (E) transposable elements.
